# Supplementary material
Source: PubMed Central journal article supplement (PMC5444808)
Supplement: NIHMS859311-supplement-supplement_1.pdf [file NIHMS859311-supplement-supplement_1.pdf]

**Appendix Table 1.** Factors Associated With DUFB Use Post-Intervention<sup>a</sup>

| Factors                                                 | DUFB use (n=168) |                              |
|---------------------------------------------------------|------------------|------------------------------|
|                                                         | OR (95% CI)      | <i>p</i> -value <sup>b</sup> |
| Reported use of DUFB                                    |                  |                              |
| Baseline                                                | (ref)            |                              |
| End of DUFB season                                      | 19.2 (10.3-35.5) | <b>&lt;0.001</b>             |
| Baseline fruit and vegetable consumption (servings/day) | 1.2 (0.9-1.5)    | 0.137                        |
| Baseline farmers market use within the past year        | 5.1 (2.4-10.7)   | <b>&lt;0.001</b>             |
| Female                                                  | 1.1 (0.3-3.4)    | 0.886                        |
| Age                                                     | 1.0 (1.0-1.1)    | 0.078                        |
| ≥1 child in the household under 18 years                | 1.5 (0.7-3.5)    | 0.329                        |
| Race                                                    |                  |                              |
| Black, non-Hispanic                                     | (ref)            |                              |
| White, non-Hispanic                                     | 0.8 (0.3-2.5)    | 0.740                        |
| Hispanic                                                | 0.9 (0.4-2.1)    | 0.817                        |
| Other                                                   | 1.7 (0.5-6.0)    | 0.442                        |
| ≥1 person in the household with diet-related disease    | 1.8 (0.9-3.6)    | 0.115                        |
| Work status                                             |                  |                              |
| Working                                                 | (ref)            |                              |
| Unemployed, in school, retired                          | 2.3 (1.1-4.7)    | <b>0.031</b>                 |
| Disabled                                                | 0.6 (0.2-2.0)    | 0.429                        |

<sup>a</sup>Clustered logistic regression model adjusted for gender, race/ethnicity, age, employment status, children under 18 years in the house, farmers market use in the last year, self and/or household member with diet-related disease, baseline fruit and vegetable consumption.

<sup>b</sup>Boldface indicates statistical significance ( $p < 0.05$ ).

DUFB, Double Up Food Bucks

**Appendix Table 2.** Use of DUFB Across Survey Waves<sup>a</sup>

| Survey Wave <sup>x</sup>                    | Unadjusted (n=177)               |                   |                  | Adjusted <sup>b</sup> (n=168)    |                     |                              |
|---------------------------------------------|----------------------------------|-------------------|------------------|----------------------------------|---------------------|------------------------------|
|                                             | Predicted prevalence of DUFB use | OR (95% CI)       | <i>p</i> -value  | Predicted prevalence of DUFB use | OR (95% CI)         | <i>p</i> -value <sup>c</sup> |
| Baseline                                    | 18.2%                            | ref               |                  | 17.8%                            | ref                 |                              |
| 1.5 months (DUFB use in the previous month) | 30.3%                            | 1.95 (1.23-3.10)  | <b>&lt;0.001</b> | 28.7%                            | 1.98 (1.17-3.36)    | <b>0.015</b>                 |
| 3 months (DUFB use in the previous month)   | 35.6%                            | 2.49 (1.60-3.87)  | <b>&lt;0.001</b> | 34.7%                            | 2.61 (1.57-4.33)    | <b>&lt;0.001</b>             |
| 5 months (any DUFB use over season)         | 67.1%                            | 9.18 (6.08-13.84) | <b>&lt;0.001</b> | 68.9%                            | 19.16 (10.33-35.53) | <b>&lt;0.001</b>             |

<sup>a</sup>Clustered logistic regression.

<sup>b</sup>Adjusted model included gender, race/ethnicity, age, employment status, children under 18 years in the house, farmers market use in the last year, self and/or household member with diet-related disease, baseline fruit and vegetable consumption.

<sup>c</sup>Boldface indicates statistical significance ( $p < 0.05$ ).

DUFB, Double Up Food Bucks

**Appendix Table 3.** Factors Associated With Fruit and Vegetable Consumption Post-Intervention<sup>a</sup>

| Factors                                              | FV consumption (n=168) |                              |
|------------------------------------------------------|------------------------|------------------------------|
|                                                      | Coefficient (95% CI)   | <i>p</i> -value <sup>b</sup> |
| Survey wave                                          |                        |                              |
| Baseline                                             | (ref)                  |                              |
| 1.5 months                                           | 0.21 (-0.06, 0.47)     | 0.132                        |
| 3 months                                             | 0.65 (0.37, 0.93)      | <b>&lt;0.001</b>             |
| 5 months                                             | 0.62 (0.32, 0.92)      | <b>&lt;0.001</b>             |
| Baseline FV consumption (servings/day)               | 0.66 (0.53, 0.76)      | <b>&lt;0.001</b>             |
| Baseline farmers market use within the past year     | 0.15 (-0.14, 0.45)     | 0.313                        |
| Baseline DUFB use                                    | 0.03 (-0.39, 0.44)     | 0.896                        |
| Female                                               | 0.29 (-0.08, 0.67)     | 0.127                        |
| Age                                                  | 0.00 (-0.02, 0.01)     | 0.561                        |
| ≥1 child in the household under 18 years             | -0.20 (-0.57, 0.16)    | 0.274                        |
| Race                                                 |                        |                              |
| Black, non-Hispanic                                  | (ref)                  |                              |
| White, non-Hispanic                                  | -0.04 (-0.34, 0.26)    | 0.785                        |
| Hispanic                                             | 0.11 (-0.42, 0.65)     | 0.675                        |
| Other                                                | 0.00 (-0.41, 0.41)     | 0.995                        |
| ≥1 person in the household with diet-related disease | -0.11 (-0.45, 0.23)    | 0.519                        |
| Work status                                          |                        |                              |
| Working                                              | (ref)                  |                              |
| Unemployed, in school, retired                       | -0.35 (-0.68, -0.02)   | <b>0.035</b>                 |
| Disabled                                             | -0.26 (-0.66, 0.13)    | 0.190                        |

<sup>a</sup>Linear mixed model adjusted for gender, race/ethnicity, age, employment status, children under 18 years in the house, farmers market use in the last year, baseline use of DUFB, self and/or household member with diet-related disease, baseline fruit and vegetable consumption.

<sup>b</sup>Boldface indicates statistical significance ( $p < 0.05$ ).

FV, fruit and vegetable; DUFB, Double Up Food Bucks

**Appendix Table 4.** Differential Change in Adjusted FV Consumption, by Baseline FV Consumption<sup>a</sup>

|                   | Baseline FV consumption 0-3 servings/day (n=85) |                                    |                              | Baseline FV consumption $\geq$ 4 servings/day (n=83) |                                    |                              |
|-------------------|-------------------------------------------------|------------------------------------|------------------------------|------------------------------------------------------|------------------------------------|------------------------------|
|                   | Servings FV/day                                 | Change in servings FV/day (95% CI) | <i>p</i> -value <sup>b</sup> | Servings FV/day                                      | Change in servings FV/day (95% CI) | <i>p</i> -value <sup>b</sup> |
| Wave 1 (baseline) | 2.18                                            | ref                                |                              | 5.07                                                 | ref                                |                              |
| Wave 2            | 3.07                                            | 0.89 (0.56, 1.21)                  | <b>&lt;0.001</b>             | 4.60                                                 | -0.48 (-0.84, -0.12)               | <b>0.010</b>                 |
| Wave 3            | 3.50                                            | 1.33 (0.96, 1.71)                  | <b>&lt;0.001</b>             | 5.05                                                 | -0.02 (-0.38, 0.34)                | 0.922                        |
| Wave 4            | 3.42                                            | 1.25 (0.86, 1.63)                  | <b>&lt;0.001</b>             | 5.07                                                 | 0.00 (-0.42, 0.42)                 | 0.990                        |

<sup>a</sup>Linear mixed model adjusted for gender, age, race/ethnicity, employment status, children under 18 years in the house, farmers market use in the last year, self and/or household member with diet-related disease, and baseline use of DUFB.

<sup>b</sup>Boldface indicates statistical significance ( $p < 0.05$ ).

FV, Fruit and Vegetable; DUFB, Double Up Food Bucks



**STRETCH YOUR  
FOOD DOLLARS**

Get more fruits & vegetables when you use your **SNAP BRIDGE CARD** at farmers markets

**JUNE 1 - OCT 31**

It's easy with  
**DOUBLE UP FOOD BUCKS!**

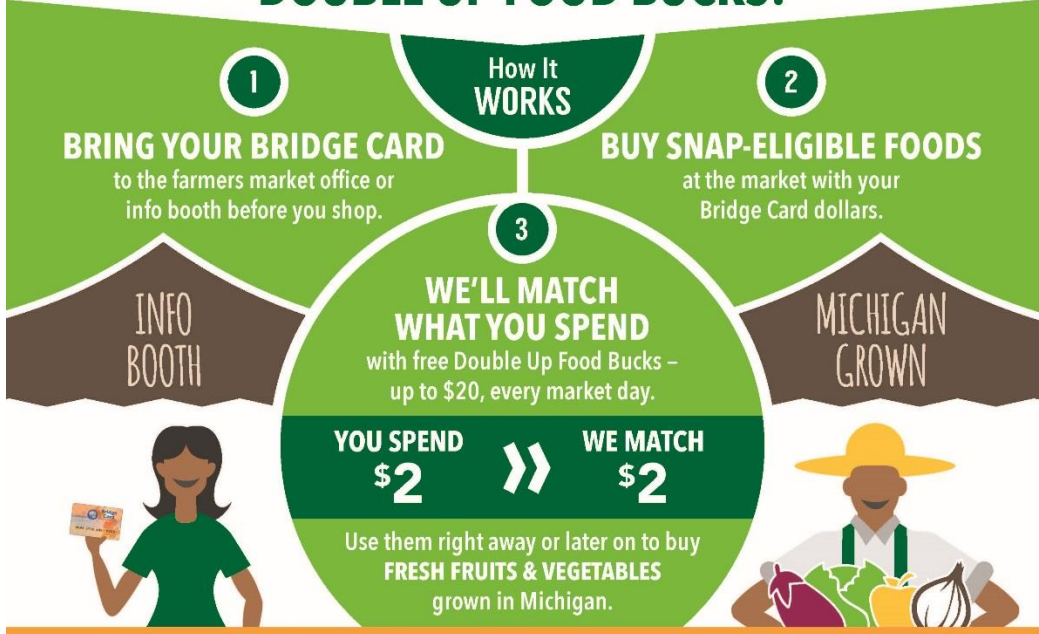

Have questions? Call us! **866-586-2796** or visit [www.DoubleUpFoodBucks.org](http://www.DoubleUpFoodBucks.org)

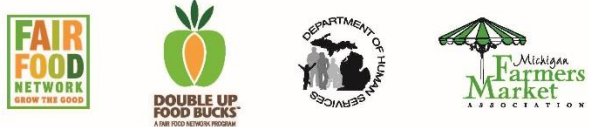

USDA is an equal opportunity provider and employer. For food help contact the toll free Michigan Food Assistance Program Hotline: 855-ASK-MICH.

## Farmers Markets That Accept Double Up Food Bucks in Washtenaw County

| NAME                                   | LOCATION                                                                  | HOURS                                                                        | 2014 SEASON       | CONTACT        | FOOD ASSISTANCE                                                                       |
|----------------------------------------|---------------------------------------------------------------------------|------------------------------------------------------------------------------|-------------------|----------------|---------------------------------------------------------------------------------------|
| Ypsilanti Depot Town Farmers Market    | 100 Rice St. in Ypsilanti's Depot Town (off Cross St. near Freight House) | Saturdays 9am-1pm                                                            | May-October       | (734) 786-8401 | SNAP/Bridge/EBT; Double Up Food Bucks; WIC Project FRESH; Senior Project/Market FRESH |
| Downtown Ypsilanti Farmers Market      | Ferris & Hamilton in Downtown Ypsilanti (next to post office)             | Tuesdays 2-6pm                                                               | May-October       | (734) 786-8401 | SNAP/Bridge/EBT; Double Up Food Bucks; WIC Project FRESH; Senior Project/Market FRESH |
| Ann Arbor Farmers Market               | 315 Detroit St. in Ann Arbor's Kerrytown area                             | May-December, Wednesdays & Saturdays 7am-3pm; June-October, Wednesdays 4-8pm | Year Round        | (734) 794-6255 | SNAP/Bridge/EBT; Double Up Food Bucks; WIC Project FRESH; Senior Project/Market FRESH |
| Cobblestone Farmers Market             | 2751 Packard Rd., Ann Arbor at Cobblestone Farm                           | Tuesdays 4-7pm                                                               | May 20 - November | (734) 794-7120 | SNAP/Bridge/EBT; Double Up Food Bucks; WIC Project FRESH; Senior Project/Market FRESH |
| Dixboro Farmers Market                 | 5221 Church Rd., Village of Dixboro                                       | Fridays 3:30-7:30pm                                                          | May-October       | (734) 707-1607 | SNAP/Bridge/EBT; Double Up Food Bucks; WIC Project FRESH                              |
| Westside Farmers Market                | Corner of W. Maple & Jackson Ave., in Westgate Plaza, Ann Arbor           | Thursdays 3-7pm                                                              | June - September  | (269) 370-7029 | SNAP/Bridge/EBT; Double Up Food Bucks; WIC Project FRESH; Senior Project/Market FRESH |
| Chelsea Saturday Farmers Market        | Palmer Lot, 222 S. Main, downtown Chelsea                                 | Saturdays 8am-Noon                                                           | May-October       | (607) 664-6333 | SNAP/Bridge/EBT; Double Up Food Bucks                                                 |
| Bushel Basket Farmers Market - Chelsea | Parking lot of Chelsea Community Hospital, near the Wellness Center       | Wednesdays 2:30-6pm                                                          | May-October       | (607) 664-6333 | SNAP/Bridge/EBT; Double Up Food Bucks; WIC Project FRESH                              |

### Farmers Markets in Ypsilanti and Ann Arbor (All Markets Shown Accept Double Up Food Bucks)

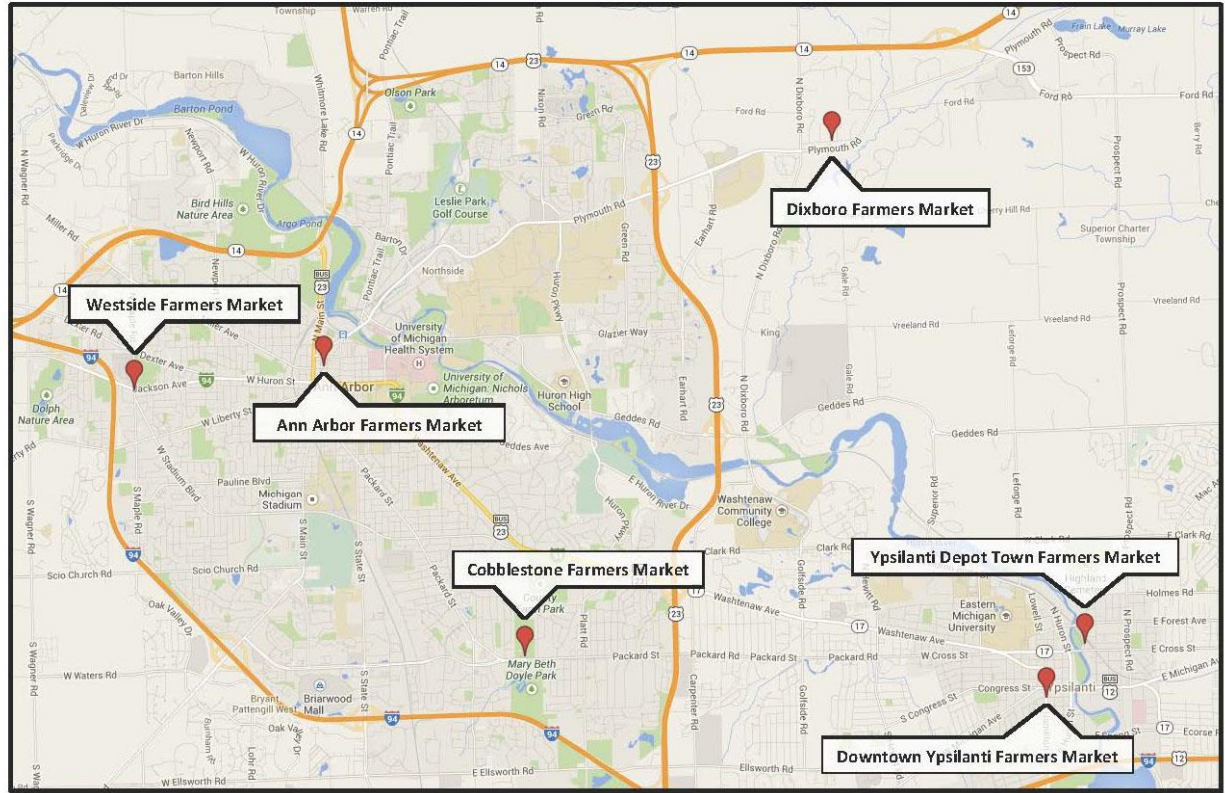

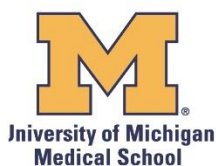

## Frequently Asked Questions about Double Up Food Bucks

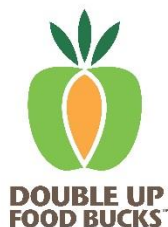

### Do I have to sign up to use Double Up Food Bucks?

No! There is no sign up required to use Double Up Food Bucks. When you use your SNAP Bridge Card at a participating farmers' market, you will automatically be eligible to get a match (up to \$20 per visit) in Double Up Food Bucks.

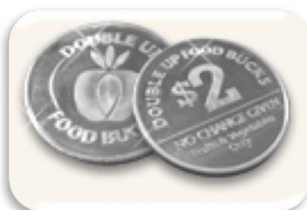

### Where can I use Double Up Food Bucks?

You can use Double Up Food Bucks at any participating farmers' market. Included in your study materials is a list of participating farmers' markets, as well as a map, hours of operation for each market, and a market contact.

### How does the process work?

Just show up at the farmers' market with your Bridge Card. Head to the information booth and decide the amount of Bridge Card money you would like to spend. You will be offered a Double Up Food Bucks match, up to \$20 that you can spend on Michigan grown fruits and vegetables.

### How do I know which vendors accept the silver Double Up Food Bucks coins?

Most vendors that sell Michigan fruits and vegetables will accept Double Up Food Bucks and will have signs up with the Double Up Food Bucks logo, others you will have to ask.

### Do my Double Up Food Buck coins expire?

No, the coins do not expire, and you do not need to use them all in a single visit. However the Double Up Food Bucks program is seasonal. In 2014 Double Up Food Bucks is available from June 1<sup>st</sup>- October 31<sup>st</sup>.

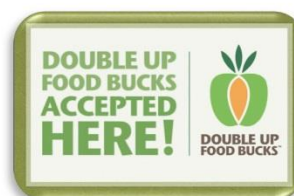

### Can I use my coins at multiple markets?

The silver Double Up Food Buck coins are universal. Those coins can be used at any market that accepts Double Up Food Bucks. The EBT coins (usually wooden) are market specific and can only be used at the market where you received those coins.

### Who can I call if I have questions?

If you have additional questions about Double Up Food Bucks, call 1-866-586-2796 or visit [www.DoubleUpFoodBucks.org](http://www.DoubleUpFoodBucks.org)
